# Supplementary material for: Daily Tasks and Willingness to Work of Dental Hygienists in Nursing Facilities Using Japanese Dental Hygienists’ Survey 2019
Source: MDPI journal article supplement (doi:10.3390/ijerph18063152), 2021-03-18
Supplement: s1 [file s1]

**Table S1.** Three parameter logistic model based on item response theory of dental hygiene practice

|                                                            | Discrimination | Difficulty | Guessing |
|------------------------------------------------------------|----------------|------------|----------|
| Intraoral examination                                      | 14.47          | -2.38      | 0.00     |
| Planning of oral hygiene management procedures             | 1.94           | -1.76      | 0.00     |
| Oral hygiene instructions for residents                    | 10.85          | -1.79      | 0.22     |
| Advice and instruction for facility staff                  | 4.62           | -1.49      | 0.44     |
| Oral hygiene procedures                                    | 3.01           | -1.79      | 0.00     |
| Instruction on denture maintenance                         | 17.10          | -1.91      | 0.00     |
| Topical fluoride application                               | 7.43           | 2.17       | 0.07     |
| Evaluation of oral function                                | 3.75           | -0.78      | 0.20     |
| Training for oral function improvement                     | 1.43           | -1.43      | 0.00     |
| Training of swallowing function                            | 1.34           | -0.55      | 0.00     |
| Training of daily oral care for facility staff             | 1.87           | -0.49      | 0.34     |
| Coordination with dentists and dental clinics              | 5.24           | -0.33      | 0.72     |
| Assisting dental check-ups                                 | 1.09           | -0.34      | 0.01     |
| Regular participation in conferences related to occupation | 14.37          | 0.34       | 0.39     |
| Participation in entrance and exit conferences             | 17.80          | 0.46       | 0.21     |
| Observation of residents' mealtime                         | 19.76          | 0.19       | 0.28     |

**Table S2.** Comparison of dental hygiene practice between willingness to work

|                                                            | Willing to work<br>(n=267) |      | Not willing to<br>work<br>(n=4) |       | Neither<br>(n=84) |      | <i>p</i> -<br>value* |
|------------------------------------------------------------|----------------------------|------|---------------------------------|-------|-------------------|------|----------------------|
|                                                            | n                          | %    | n                               | %     | n                 | %    |                      |
| Intraoral examination                                      | 260                        | 97.4 | 4                               | 100.0 | 82                | 97.6 | 0.517                |
| Planning of oral hygiene management procedures             | 238                        | 89.1 | 3                               | 75.0  | 73                | 86.9 | 0.825                |
| Oral hygiene instructions for residents                    | 256                        | 95.9 | 3                               | 75.0  | 81                | 96.4 | 0.013                |
| Advice and instruction for facility staff                  | 252                        | 94.4 | 3                               | 75.0  | 79                | 94.0 | 0.079                |
| Oral hygiene procedures                                    | 245                        | 91.8 | 3                               | 75.0  | 78                | 92.9 | 0.224                |
| Instruction on denture maintenance                         | 256                        | 95.9 | 4                               | 100.0 | 81                | 96.4 | 0.883                |
| Topical fluoride application                               | 21                         | 7.9  | 0                               | 0.0   | 6                 | 7.1  | 0.820                |
| Evaluation of oral function                                | 208                        | 77.9 | 2                               | 50.0  | 60                | 71.4 | 0.132                |
| Training for oral function improvement                     | 217                        | 81.3 | 2                               | 50.0  | 62                | 73.8 | 0.124                |
| Training of swallowing function                            | 163                        | 61.0 | 1                               | 25.0  | 50                | 59.5 | 0.284                |
| Training of daily oral care for facility staff             | 201                        | 75.3 | 4                               | 100.0 | 57                | 67.9 | 0.358                |
| Coordination with dentists and dental clinics              | 236                        | 88.4 | 4                               | 100.0 | 65                | 77.4 | 0.053                |
| Assisting dental check-ups                                 | 146                        | 54.7 | 2                               | 50.0  | 41                | 48.8 | 0.739                |
| Regular participation in conferences related to occupation | 156                        | 58.4 | 2                               | 50.0  | 46                | 54.8 | 0.819                |
| Participation in entrance and exit conferences             | 106                        | 39.7 | 2                               | 50.0  | 22                | 26.2 | 0.149                |
| Observation of residents' mealtime                         | 156                        | 58.4 | 1                               | 25.0  | 40                | 47.6 | 0.116                |

\* Chi-square test
